# Supplementary material for: Nucleoid-Associated Proteins Affect Mutation Dynamics in E. coli in a Growth Phase-Specific Manner
Source: PLOS journal article supplement (doi:10.1371/journal.pcbi.1002846), 2012-12-20
Supplement: S9 (10.1371/journal.pcbi.1002846.s009) [file journal.pcbi.1002846.s009]

**Table S2** – Potential predictors of mutability considered in the classifier analysis

| Feature                 | Values                                                                                                                                                             |
|-------------------------|--------------------------------------------------------------------------------------------------------------------------------------------------------------------|
| NAP binding             | Bound by any NAP early, late, always or never*                                                                                                                     |
| Strand                  | Strand on which the corresponding gene is located                                                                                                                  |
| Distance to the origin  | Shortest distance (clock- or counter-clockwise) to the origin                                                                                                      |
| CDS length              | Length of the coding sequence in nucleotides                                                                                                                       |
| Upstream nucleotide     | Identity of the upstream nucleotide (in relation to the orientation of the reading frame) <ul style="list-style-type: none"><li>• one of A, C, G, or T</li></ul>   |
| Downstream nucleotide   | Identity of the downstream nucleotide (in relation to the orientation of the reading frame) <ul style="list-style-type: none"><li>• one of A, C, G, or T</li></ul> |
| Distance from CDS start | The distance from the start of the coding sequence in nucleotides                                                                                                  |

|                                            |                                                                                                                                  |
|--------------------------------------------|----------------------------------------------------------------------------------------------------------------------------------|
| Distance from CDS end                      | The distance from the end of the coding sequence in nucleotides                                                                  |
| Expression level prior to stationary phase | Mean expression level across replicates in mid- and late exponential and transition to stationary phase as determined by [31,32] |
| Expression level during stationary phase   | Mean expression level across replicates during stationary phase as determined by [31,32]                                         |
| Regional GC content                        | GC content in a window of $\pm 500$ nucleotides around the focal site                                                            |
| Local GC content                           | GC content in a window of $\pm 50$ nucleotides around the focal site                                                             |

\* see Table S3 for precise encoding
