# Supplementary material for: Nucleoid-Associated Proteins Affect Mutation Dynamics in E. coli in a Growth Phase-Specific Manner
Source: PLoS Comput Biol. 2012 Dec 20;8(12):e1002846. doi: 10.1371/journal.pcbi.1002846 (PMC3527292; doi:10.1371/journal.pcbi.1002846)
Supplement: Table S3 — Encoding growth phase-specific binding. (PDF) [file pcbi.1002846.s010.pdf]

**Table S3.** Encoding growth phase-specific binding

| Bound*<br>during mid-<br>exponential<br>phase | Bound during<br>late<br>exponential<br>phase | Bound<br>during<br>transition to<br>stationary<br>phase | Bound<br>during<br>stationary<br>phase | Category  | Number of<br>changes/synonymous<br>sites in category <sup>†</sup> |
|-----------------------------------------------|----------------------------------------------|---------------------------------------------------------|----------------------------------------|-----------|-------------------------------------------------------------------|
| ✓                                             | ✓                                            | ✓                                                       | ✓                                      | Always    | 1,155/74,612                                                      |
| ✗                                             | ✗                                            | ✗                                                       | ✗                                      | Never     | 7,244/543,086                                                     |
| ✗                                             | ✗                                            | ✓                                                       | ✓                                      | Late      | 157/13,565                                                        |
| ✗                                             | ✗                                            | ✗                                                       | ✓                                      | Late      | 396/32,478                                                        |
| ✓                                             | ✗                                            | ✗                                                       | ✗                                      | Early     | 351/19,734                                                        |
| ✓                                             | ✓                                            | ✗                                                       | ✗                                      | Early     | 652/37,562                                                        |
| ✓                                             | ✓                                            | ✓                                                       | ✗                                      | Discarded | 52/3,703                                                          |
| ✓                                             | ✗                                            | ✓                                                       | ✓                                      | Discarded | 16/1,308                                                          |
| ✓                                             | ✓                                            | ✗                                                       | ✓                                      | Discarded | 57/5,254                                                          |
| ✓                                             | ✗                                            | ✗                                                       | ✓                                      | Discarded | 28/1,250                                                          |
| ✓                                             | ✗                                            | ✓                                                       | ✗                                      | Discarded | 6/259                                                             |
| ✗                                             | ✗                                            | ✓                                                       | ✗                                      | Discarded | 25/1,998                                                          |
| ✗                                             | ✓                                            | ✗                                                       | ✗                                      | Discarded | 254/16,598                                                        |
| ✗                                             | ✓                                            | ✓                                                       | ✓                                      | Discarded | 223/23,859                                                        |
| ✗                                             | ✓                                            | ✓                                                       | ✗                                      | Discarded | 19/1,183                                                          |
| ✗                                             | ✓                                            | ✗                                                       | ✓                                      | Discarded | 40/3,712                                                          |

\*by any of the four NAPs considered

<sup>†</sup>includes 2-fold synonymous sites for transitions
